# Supplementary material for: Levels of circulatory branched-chain amino acids are associated with dietary regimen. A cross- sectional analysis
Source: Research Square preprint supplement (doi:10.21203/rs.3.rs-5284683/v1), 2024-10-21
Supplement: Supplementary file 1 [file fd61fff3cfed2551e4d0e8aa.xlsx]

## Sheet: Table S1
	Supplementary table 1: comparison of included and excluded participants
		Included	Excluded	P-value
	Sample size	2,159	2,905
	Women (%)	1,257 (58.2)	1,450 (49.9)	<0.001
	Age (years)	53.4 ± 8.6	61.0 ± 10.7	<0.001
	Born in Switzerland (%)	1,371 (63.5)	1,813 (62.4)	0.426
	Living in couple (%)	1,247 (57.8)	1,615 (55.6)	0.124
	Educational level (%)
	Low	946 (43.8)	1,728 (59.6)	<0.001
	Medium	612 (28.4)	694 (23.9)	<0.001
	High	600 (27.8)	479 (16.5)	<0.001
	Smoking categories (%)
	Never	918 (42.5)	1,117 (39.2)	0.001
	Former	748 (34.7)	1,135 (39.9)	0.001
	Current	493 (22.8)	596 (20.9)	0.001
	On a diet (%)	476 (22.1)	1,098 (37.8)	<0.001
	Sedentary (%)	1,082 (50.1)	1,323 (65.4)	<0.001
	Body mass index (kg/m2)	24.0 ± 2.9	27.9 ± 5.0	<0.001
	BMI categories (%)
	Normal	1,346 (62.3)	834 (29.4)	<0.001
	Overweight	813 (37.7)	1,147 (40.4)	<0.001
	Obese	0 (0.00)	859 (30.3)	<0.001
	BMI, body mass index. Results are expressed as number of participants (percentage) for categorical variables and as average ± standard deviation for continuous variables. Between-group comparisons performed using chi-square for categorical variables and student’s t-test for continuous variables

## Sheet: Table S2
	Supplementary table 2: Spearman correlation coefficients between blood levels of branched chain amino acids and food items, CoLaus|PsyColaus study, Lausanne, Switzerland, 2009-2012, overall and stratified by gender.
		ALL SUBJECTS							WOMEN							MEN
		Leucine		Isoleucine		Valine			Leucine		Isoleucine		Valine			Leucine		Isoleucine		Valine
	Food item	Spearman r	P-value	Spearman r	P-value	Spearman r	P-value		Spearman r	P-value	Spearman r	P-value	Spearman r	P-value		Spearman r	P-value	Spearman r	P-value	Spearman r	P-value
	Plain yogurth	-0.10533	9.34e-07	-0.122603	1.1e-08	-0.0918853	1.9e-05		0.0004947	0.98602	-0.0253342	0.369477	0.0025318	0.928547		-0.0414909	0.213162	-0.0594926	0.0741214	-0.0554355	0.0961359
	Low-fat yogurth	-0.0158859	0.46066	-0.0385686	0.0731777	-0.0207644	0.334864		0.0192629	0.495028	-0.0090751	0.747878	0.0113181	0.688503		0.0171991	0.605948	-0.009657	0.772095	0.0043343	0.896571
	Fruit/aroma yogurth	0.0364408	0.0904923	0.0279459	0.194285	0.0147144	0.494388		-0.0692304	0.014088	-0.0723704	0.0102686	-0.0744698	0.0082586		0.0087495	0.792999	-0.0054984	0.869016	0.0068599	0.836993
	Cottage cheese (0% fat)	-0.0646886	0.002637	-0.0754358	0.0004513	-0.0469757	0.0290601		-0.005319	0.850568	-0.0252477	0.371113	0.0091359	0.746247		-0.0249514	0.454188	-0.035064	0.292822	-0.0178432	0.592519
	Cottage cheese, ricotta	-0.0676951	0.0016482	-0.0754558	0.0004497	-0.0550908	0.0104595		-0.0306583	0.277418	-0.0435923	0.122413	-0.0309388	0.273044		0.0526657	0.113963	0.0462116	0.165532	0.0329889	0.32234
	Feta, mozzarella	0.0565709	0.0085598	0.0466219	0.0302951	0.0457942	0.0333609		0.0314352	0.265418	0.0366105	0.194583	0.0133835	0.635465		0.0223916	0.50181	-0.0071483	0.83024	0.0348295	0.296063
	Gruyère, tomme, camembert	0.0792576	0.0002275	0.0651154	0.0024695	0.0762397	0.0003917		-0.0497601	0.077809	-0.0575445	0.041365	-0.027833	0.32413		0.0243797	0.464599	-0.0114318	0.731696	0.0411629	0.216806
	Cheese fondue	0.0871018	5.07e-05	0.078759	0.0002492	0.0643454	0.002779		0.0037223	0.89511	-0.0080567	0.775365	-0.001828	0.948377		0.0306564	0.357754	0.0336153	0.313232	0.0155298	0.641365
	White or soft bread, tresse	0.107338	5.76e-07	0.110256	2.81e-07	0.0835567	0.0001015		0.0122601	0.664102	0.0395122	0.161505	0.030393	0.281598		-0.0149627	0.65359	-0.0354795	0.287136	-0.0500572	0.133035
	Whole wheat bread, rye bread	-0.0893974	3.19e-05	-0.100213	3.08e-06	-0.0741266	0.0005668		-0.0605485	0.0318306	-0.0838711	0.0029216	-0.068461	0.0151964		-0.0239008	0.473419	-0.0276639	0.406627	0.0052884	0.873976
	Müesli	-0.0609109	0.0046371	-0.071027	0.0009582	-0.0554241	0.0100017		-0.0280397	0.320548	-0.0486672	0.0845707	-0.0295557	0.295071		-0.0018944	0.954693	-0.007864	0.813543	0.0007228	0.982705
	Corn-flakes, puffed rice	0.0091112	0.672209	0.005904	0.783953	0.0037971	0.860034		0.0216963	0.442161	0.029966	0.288416	0.0256264	0.363979		-0.0437782	0.188977	-0.0608187	0.0678886	-0.0571071	0.0865038
	Rusks, swedish bread	-0.076267	0.0003898	-0.0939239	1.23e-05	-0.0782328	0.0002742		-0.0024699	0.930289	-0.0261562	0.354143	-0.0188057	0.505323		-0.0811827	0.0147348	-0.0902379	0.0066895	-0.0716188	0.0314976
	Beef, horse, veal	0.268528	5.62e-37	0.236052	1.01e-28	0.227412	1.01e-26		0.0118955	0.673508	-0.0082298	0.770673	0.0209992	0.456967		0.125765	0.0001525	0.0570663	0.0867291	0.122346	0.0002303
	Chicken, skinned	-0.0025708	0.904972	-0.0143136	0.506222	0.008532	0.691944		0.0133053	0.63744	-0.0074267	0.792514	0.0067672	0.810571		0.0514483	0.122578	0.0272237	0.414136	0.0665115	0.0458248
	Chicken, with skin	0.114957	8.5e-08	0.116762	5.3e-08	0.0904641	2.56e-05		0.0024897	0.929732	0.0006518	0.981581	0.001108	0.968696		0.0357512	0.283459	0.045238	0.174635	0.0347567	0.297075
	Hamburger, rib steak, roasted meat	0.193546	1.15e-19	0.173101	5.51e-16	0.175329	2.3e-16		0.0472317	0.0941638	0.0368537	0.191634	0.0554539	0.0493415		0.123261	0.0002065	0.089437	0.0071935	0.113016	0.0006728
	Cured ham, mutton or pork chops	0.0693162	0.0012695	0.0660908	0.0021228	0.0708914	0.00098		-0.0194945	0.489855	-0.0099476	0.724582	-0.0084929	0.763555		0.073383	0.027535	0.0606248	0.0687721	0.0839334	0.0116772
	Sausage, salami, ham	0.172021	8.39e-16	0.153834	6.64e-13	0.167842	4.16e-15		0.0774847	0.0059858	0.0522966	0.0638023	0.082357	0.0034783		0.0984913	0.0030652	0.0718341	0.0309891	0.116047	0.000479
	Pâté, terrine	0.0785715	0.0002578	0.0792559	0.0002275	0.0656942	0.002258		0.0048016	0.864955	-0.0007522	0.978744	0.0080774	0.774804		0.0232046	0.486406	0.0348823	0.295332	0.0125908	0.705702
	Cervelas, wieners	0.105205	9.63e-07	0.0996772	3.48e-06	0.0638632	0.0029905		0.0123983	0.660553	0.0003303	0.990664	-0.0153299	0.58713		0.0318836	0.338827	0.0479732	0.149974	0.0087417	0.793179
	Frankfurter, small sausages	0.125498	4.89e-09	0.119877	2.31e-08	0.0926769	1.61e-05		0.019996	0.478755	0.0227666	0.419971	0.0103666	0.713483		0.0486657	0.144172	0.0178132	0.59314	0.0172949	0.603941
	Liver (veal or pork), offalls	-0.0098151	0.648528	-0.0206058	0.338569	-0.0197255	0.359611		-0.0035836	0.898998	-0.0159819	0.571326	-0.0235655	0.403841		-0.0113277	0.734047	-0.0299568	0.368835	-0.0077142	0.817032
	Liver (poultry)	0.0096634	0.653604	0.0102638	0.633616	0.0139424	0.517314		-0.0533261	0.0587448	-0.0520182	0.06523	-0.054535	0.0532352		0.0440671	0.186073	0.0517444	0.120437	0.0733915	0.0275168
	Salmon (fresh or smoked)	-0.012123	0.573441	-0.0243136	0.258795	0.0128854	0.549575		-0.0123129	0.662746	-0.0081659	0.772403	0.0205222	0.467257		0.0516557	0.121076	0.0152016	0.648427	0.0605281	0.0692165
	Fried or breaded fish	0.0878017	4.4e-05	0.0826261	0.0001213	0.0511056	0.0175583		-0.026517	0.347542	-0.0323314	0.252026	-0.0369682	0.190256		0.0455722	0.171469	0.0256542	0.441574	0.00557	0.867327
	Tuna in oil	0.0761766	0.0003961	0.0871389	5.03e-05	0.0668018	0.0018988		0.021737	0.441304	0.0232398	0.410372	0.0128312	0.649479		-0.0345924	0.299366	-0.0033977	0.918834	-0.0115809	0.728335
	White fish (cod, trout, hake)	-0.0317875	0.139802	-0.0351265	0.10274	-0.0185565	0.388796		-0.0062829	0.823897	-0.0068935	0.807104	-0.0067398	0.811324		0.015492	0.642175	0.0058985	0.859581	0.0358253	0.282461
	Seafood (shrimps, mussels)	0.0214952	0.318129	0.0187546	0.383752	0.02817	0.19073		-0.0072398	0.797621	-0.0071577	0.799866	0.0092124	0.744197		0.0464218	0.163614	0.0402228	0.227495	0.0389021	0.243137
	Green beans, spinach	-0.0387329	0.0719618	-0.062787	0.0035162	-0.0435636	0.042973		-0.0075335	0.789597	-0.0365421	0.195419	-0.0251441	0.37308		-0.0103418	0.756427	-0.0518547	0.119648	-0.0161828	0.627406
	Cauliflower, broccoli	-0.0090796	0.67328	-0.0386398	0.0726491	0.0102269	0.634835		-0.0028409	0.919851	-0.0357821	0.204881	0.0119401	0.672354		0.0042022	0.899708	-0.0375036	0.260508	0.0306498	0.357858
	Tomatoes	0.0071283	0.740623	-0.0035936	0.867466	0.01433	0.505736		0.0149032	0.59758	0.0025081	0.929214	0.0111084	0.693981		0.0715235	0.031725	0.0555528	0.0954333	0.062445	0.0608397
	Carrots	-0.0846838	8.16e-05	-0.101932	2.08e-06	-0.0627345	0.0035438		-0.0219132	0.437609	-0.0526316	0.0621187	-0.0118321	0.675146		-0.0390109	0.241821	-0.0498396	0.134731	-0.0100418	0.763278
	Green salad	-0.0599848	0.005302	-0.0797599	0.0002074	-0.048341	0.0246925		-0.0093177	0.741377	-0.0320438	0.256272	-0.008468	0.764229		0.0239074	0.473297	-0.0027173	0.935046	0.0240419	0.470811
	Vinaigrette sauce	-0.0964928	7.07e-06	-0.0867685	5.41e-05	-0.0683371	0.0014872		0.0332824	0.238337	0.0434701	0.123465	0.0321431	0.2548		0.0634105	0.0569489	0.0878869	0.0082665	0.0523329	0.116269
	Green peas, corn, maize	0.0597045	0.0055194	0.0427226	0.0471597	0.040221	0.0616864		0.0307219	0.276421	0.0092864	0.742215	0.0165172	0.558507		-0.0244115	0.464016	-0.0464889	0.163006	-0.0217185	0.514756
	Avocado	-0.0174057	0.418889	-0.0092124	0.668786	-0.0101573	0.637144		0.021216	0.452332	0.0313055	0.267396	0.0079822	0.777388		-0.0373071	0.263016	-0.022738	0.495215	-0.0116382	0.727044
	Vegetable broth	-0.0114914	0.593578	-0.0261113	0.22522	-0.0198139	0.357464		0.0281778	0.31817	0.0104957	0.710074	0.0092272	0.743802		-0.0354723	0.287235	-0.0572336	0.0858077	-0.0310449	0.351691
	Vegetable soup (peas, beans, minestrone)	-0.0204305	0.342696	-0.0280698	0.192314	-0.0147571	0.493137		-0.0228391	0.418492	-0.0322523	0.253189	0.0087926	0.755472		-0.101217	0.0023386	-0.110611	0.0008759	-0.0969033	0.003578
	Potatoes, boiled	0.0767555	0.0003575	0.0684265	0.001466	0.0643318	0.0027848		-0.0280467	0.320428	-0.0272192	0.334919	-0.0205651	0.466325		-0.0618522	0.0633356	-0.0923347	0.0055168	-0.0335842	0.31368
	French fries	0.181913	1.61e-17	0.173662	4.42e-16	0.149476	2.94e-12		0.0489136	0.083006	0.0364239	0.196868	0.0335992	0.233896		0.0527226	0.113572	0.0468966	0.159344	0.0509792	0.12603
	Pasta	0.279907	<10E-25	0.284231	<10E-25	0.223437	7.84e-26		0.0260268	0.356529	0.0423109	0.133801	0.0249702	0.376397		0.0511735	0.124591	0.0438034	0.188722	0.0556841	0.0946516
	Ravioli, tortellini, cannelloni	0.121839	1.35e-08	0.125331	5.12e-09	0.105952	8.05e-07		-0.0083686	0.766916	-0.0042498	0.880352	-0.0024125	0.931906		0.009877	0.767051	0.0149988	0.652808	0.0292145	0.380824
	Rice	0.0808163	0.0001705	0.0734862	0.0006327	0.0774745	0.0003143		0.0223473	0.428584	0.02134	0.449695	0.0366978	0.193521		0.0214543	0.519884	-0.0127429	0.702315	0.0203977	0.540653
	Tomato sauce	0.100769	2.71e-06	0.104529	1.13e-06	0.0758803	0.0004174		0.0223057	0.429444	0.0225377	0.42466	0.014184	0.615381		0.0535828	0.107793	0.0584254	0.0794694	0.031422	0.34587
	Couscous, semolina	-0.0190751	0.375675	-0.0406135	0.0591879	-0.0123774	0.565423		0.0582749	0.0388485	0.0326909	0.246789	0.0301677	0.285182		-0.0307694	0.355985	-0.0593956	0.0745949	-0.0001832	0.995616
	Pizza	0.182071	1.51e-17	0.178806	5.71e-17	0.151599	1.43e-12		0.0139062	0.62232	0.007757	0.78351	0.0092042	0.744417		0.0588695	0.077207	0.0476926	0.152374	0.0703622	0.0346094
	Quiche	-0.0144196	0.503077	-0.0325021	0.131111	-0.0237945	0.269103		-0.0242371	0.390574	-0.0467309	0.0977093	-0.0180524	0.522531		-0.0196666	0.555263	-0.0398809	0.231474	-0.0458327	0.169032
	Eggs (any processing)	-0.0036271	0.866241	-0.0078185	0.716543	0.0175201	0.415839		0.0263206	0.351125	0.010834	0.701172	0.0482995	0.0869489		0.0018625	0.955454	-0.004029	0.903821	0.0158881	0.633689
	Tofu	-0.0491219	0.0224594	-0.0438384	0.0416746	-0.0279245	0.194627		-0.0086413	0.759549	-0.0130056	0.64504	0.0001364	0.996145		-0.0364306	0.274403	-0.0094225	0.777481	-0.0084758	0.799336
	Margarine, low fat	-0.0020971	0.92242	-0.0106465	0.621012	-0.0158803	0.460821		0.0116591	0.679631	0.0057705	0.838051	0.0091739	0.74523		-0.0443018	0.183737	-0.0621625	0.0620185	-0.0732131	0.0278968
	Butter	-0.0060597	0.778402	-0.0123461	0.566406	-0.0030419	0.887663		-0.0325689	0.248558	-0.0164871	0.559223	-0.0290275	0.303789		-0.0256429	0.441774	-0.0577891	0.0828042	-0.0095886	0.773664
	Cream (35% fat)	-0.0292532	0.174224	-0.0330108	0.125183	-0.0168203	0.43471		2.45e-06	0.999931	-0.009877	0.726458	0.0113296	0.688203		0.0189197	0.570385	0.0192127	0.564429	0.004065	0.902965
	Mayonnaise sauce	0.026728	0.214451	0.0378299	0.0788532	0.0149076	0.488736		-0.0148531	0.598812	-0.0038181	0.892427	-0.0013664	0.961399		-0.0860948	0.0096835	-0.0729272	0.0285152	-0.0872698	0.008732
	Banana, apple, pear, plum, grapes	-0.114034	1.08e-07	-0.125008	5.61e-09	-0.0739072	0.0005886		-0.0669739	0.017558	-0.0920828	0.0010815	-0.0349595	0.215491		-0.020891	0.530906	-0.0065784	0.843594	0.0048606	0.884097
	Citrus fruits (orange, mandarine)	-0.0124376	0.563532	-0.0051746	0.810096	-0.0093469	0.664245		-0.0115012	0.683733	-0.0030167	0.91491	0.0056612	0.841078		-0.001817	0.956542	0.009804	0.768723	-0.0170036	0.61005
	Peach, apricot, melon	-0.0169408	0.431425	-0.0527288	0.0142726	-0.0386286	0.0727319		0.0009794	0.972328	-0.0518808	0.0659444	-0.0493568	0.0802513		0.0317727	0.340511	-0.0021092	0.949562	0.0242034	0.467835
	Berries (strawberries, blueberries)	-0.0111944	0.60316	-0.0378515	0.0786823	-0.0174527	0.417634		-0.054362	0.0539959	-0.0727016	0.0099252	-0.0600716	0.0332051		0.0368184	0.269324	-0.0099473	0.765441	0.0297594	0.372
	Kiwi	-0.147018	6.67e-12	-0.151852	1.31e-12	-0.111734	1.94e-07		-0.0888732	0.0016103	-0.0956098	0.0006884	-0.0614203	0.0294436		-0.0492819	0.139155	-0.0542927	0.103201	-0.0223046	0.503473
	Fruit, preserve	-0.00494	0.818553	-0.0027454	0.89855	0.0090461	0.674419		-0.0386276	0.171106	-0.029945	0.288754	-0.0074762	0.791162		-0.0286694	0.389779	-0.0351663	0.291415	-0.0153541	0.645142
	Croissant, chocolate bread	0.154303	5.65e-13	0.144717	1.42e-11	0.0922566	1.76e-05		-0.0099819	0.723672	-0.0175396	0.534414	-0.0545369	0.0532265		0.0398053	0.23236	0.029583	0.374843	0.0233975	0.482787
	Fruit tart	0.0497548	0.0207803	0.0203965	0.3435	0.0142596	0.507829		-0.0299488	0.288693	-0.0653355	0.0205263	-0.0745507	0.0081888		-0.038064	0.253448	-0.0702974	0.0347768	-0.0192232	0.564218
	Cream tart, cream cake	0.0778396	0.0002944	0.0769558	0.0003449	0.0552084	0.0102958		-0.0364583	0.196446	-0.0295117	0.295793	-0.0338526	0.230385		0.0077508	0.816179	-0.0043943	0.895149	0.0111321	0.738471
	Cake, dried pastries	0.0446523	0.0380231	0.0331422	0.123686	0.025057	0.244512		0.0187417	0.506774	0.0048647	0.863199	-0.0105945	0.70747		0.0144931	0.663783	0.00311	0.925686	0.0136842	0.681489
	Biscuits, cookies	0.035748	0.0967938	0.0285799	0.184353	0.0169542	0.431061		-0.0590977	0.0361702	-0.0686389	0.0149335	-0.0680412	0.015833		-0.0235995	0.479015	-0.0200575	0.547428	-0.0155101	0.641788
	Chocolate	-0.0192546	0.371199	-0.0168104	0.43498	-0.0116831	0.587433		-0.0610423	0.0304588	-0.0623965	0.0269547	-0.0361949	0.1997		-0.0553089	0.0968989	-0.0501039	0.132673	-0.0354104	0.288077
	Honey, jam	-0.0746568	0.000517	-0.0909203	2.33e-05	-0.0712054	0.0009301		-0.0573356	0.0421094	-0.0629551	0.0256138	-0.0594027	0.0352182		-0.0662997	0.0465217	-0.10048	0.0025176	-0.0522579	0.116794
	Ice cream, sorbet	0.103271	1.52e-06	0.0851616	7.43e-05	0.0826535	0.0001206		0.0314877	0.264621	0.0012368	0.965059	0.0078115	0.782027		0.0260739	0.434136	0.0093531	0.779077	0.0402035	0.227719
	Sugar	0.0955559	8.68e-06	0.12281	1.04e-08	0.0543761	0.0115043		-0.0079815	0.777407	0.0299966	0.287924	-0.0089965	0.74999		-0.0823387	0.0133731	-0.0387876	0.244528	-0.0950808	0.0042617
	Butter (for cooking)	0.0758693	0.0004182	0.0559699	0.0092905	0.0668587	0.0018818		0.040325	0.153048	0.0166836	0.554549	0.0293641	0.298215		0.0987584	0.0029858	0.0689251	0.0384861	0.0735432	0.0271974
	Margarine (for cooking)	0.0259268	0.228514	0.0310545	0.149172	0.0178643	0.406736		0.0099567	0.72434	0.0178384	0.527474	0.0144154	0.609629		0.0204777	0.539066	0.0128802	0.699263	0.0020996	0.949789
	Olive oil (for cooking)	0.0710354	0.0009568	0.0607641	0.0047372	0.063445	0.0031856		0.0697108	0.0134326	0.0419008	0.137614	0.0635614	0.0242241		-0.0044429	0.893996	-0.0068003	0.83839	-0.0021025	0.949721
	Peanut oil (for cooking)	0.0689569	0.0013457	0.0677837	0.0016251	0.0503123	0.0193929		-0.0311333	0.270038	-0.010018	0.722712	-0.0212912	0.45073		0.021042	0.527938	0.0017677	0.957718	0.0095535	0.77447
	Sunflowerseed oil (for cooking)	0.0440194	0.040838	0.0641396	0.0028675	0.0282032	0.190208		0.0144292	0.609285	0.0543175	0.0541934	0.0154568	0.584039		-0.0052664	0.874497	0.0167749	0.614863	-0.0200845	0.546889
	Coffee (excl. Decafeinated)	0.0412511	0.0553091	0.0216183	0.315364	0.0446671	0.0379596		0.0154789	0.583499	-0.0040103	0.887048	0.0171585	0.543334		0.0296804	0.373272	0.0171963	0.606006	0.0412005	0.216386
	Milk in coffee (0% fat)	0.0204863	0.341379	0.0108415	0.61463	0.0319644	0.137611		0.0182416	0.518182	0.0065915	0.8154	0.049576	0.0789165		0.0110647	0.739996	-0.0123149	0.71186	0.0028607	0.931628
	Milk in coffee (non 0% fat)	-0.0619034	0.0040092	-0.0684106	0.0014698	-0.0625753	0.003629		0.0192547	0.495211	0.0219016	0.437853	0.0067896	0.809957		-0.0544152	0.102424	-0.0854926	0.010206	-0.0709097	0.0332228
	Coffee creamer	-0.052595	0.0145211	-0.0622051	0.0038342	-0.0626507	0.0035885		-0.0674933	0.016699	-0.074159	0.0085321	-0.058487	0.0381422		-0.0830707	0.0125694	-0.0900986	0.0067748	-0.101767	0.0022125
	Milk as drink (0% fat)	0.0333908	0.120893	0.0200654	0.351391	0.0396159	0.0657077		0.0064188	0.820152	-0.0188474	0.50438	0.0263361	0.350842		-0.0271274	0.41579	-0.0313457	0.347042	-0.0008374	0.979964
	Milk as drink (non 0% fat)	0.0116471	0.588585	0.0094459	0.660908	0.0154446	0.473213		0.0361405	0.200377	0.0248704	0.378308	0.0332285	0.239098		-0.031204	0.349227	-0.0338059	0.310495	-0.0191981	0.564725
	Mineral water (Aproz, Valser, San Pellegrino)	0.0348076	0.105902	0.0343146	0.110942	0.0403228	0.0610299		-0.008209	0.771236	-0.0028153	0.920571	0.0019088	0.946097		0.0396594	0.234078	0.0231018	0.488339	0.0531188	0.110881
	Mineral water (Perrier, Vittel, Volvic)	0.0111849	0.603466	0.0134828	0.531221	0.0127705	0.553138		-0.0009847	0.972178	0.0126537	0.65401	-0.0108669	0.700307		0.0996394	0.0027372	0.0834659	0.0121534	0.0985727	0.0030408
	Tap water, mineral water (Henniez, Evian, Vichy)	-0.048248	0.0249709	-0.0523992	0.014892	-0.0420667	0.050658		-0.0124086	0.660287	-0.0151598	0.591284	-0.0058481	0.835904		0.0196878	0.554838	0.0097763	0.769358	-0.0093822	0.778408
	Lemonade, soda, syrup	0.0816065	0.0001471	0.0946692	1.05e-05	0.0492705	0.022055		-0.0022215	0.937285	0.0296841	0.292978	-0.0218069	0.439837		-0.0612072	0.0661466	-0.05112	0.124986	-0.0584652	0.0792647
	Fresh fruit juice	-0.0199506	0.354155	-0.021997	0.306959	-0.007672	0.721631		0.0134551	0.633658	0.0113892	0.686648	0.0105578	0.708437		0.0682716	0.0403672	0.0606225	0.0687826	0.0662087	0.0468238
	Bottled fruit juice	0.0692611	0.0012809	0.0586979	0.0063686	0.0500759	0.019971		0.0333615	0.237222	0.0233245	0.408668	0.0260309	0.356455		0.0119695	0.719596	0.0102136	0.759352	-0.0027818	0.933509
	Tea, herbal tea	-0.192436	1.87e-19	-0.195217	5.5e-20	-0.145053	1.27e-11		-0.0503539	0.074324	-0.0407432	0.148829	-0.0376206	0.182548		-0.0596679	0.0732715	-0.0781564	0.0188931	-0.0153741	0.644711
	Beer	0.317273	<10E-25	0.29719	<10E-25	0.245153	6.47e-31		0.0763187	0.0067879	0.0465186	0.0992434	0.0342032	0.225591		0.0636622	0.0559693	0.0435337	0.191462	0.0494862	0.137522
	Wine, champagne	0.140808	4.98e-11	0.114106	1.06e-07	0.0980847	4.97e-06		0.0471452	0.0947692	0.026508	0.347705	-0.0014901	0.95791		0.041982	0.20779	-0.007304	0.826603	0.0346003	0.299256
	Aperitifs (Martini)	0.0649703	0.0025253	0.0792215	0.000229	0.0532105	0.0134079		0.0183211	0.516358	0.0497506	0.0778658	-0.0011657	0.967067		0.0213762	0.521406	0.0139288	0.676118	0.0229618	0.490978
	Spirits (whisky, licquor)	0.221887	1.73e-25	0.218582	9.13e-25	0.181809	1.68e-17		0.0286558	0.310027	0.0336644	0.232989	0.00424	0.880624		0.084995	0.0106565	0.0631163	0.0581117	0.0855807	0.010128
	Results are expressed as Spearman correlation coefficient and corresponding p-value.

## Sheet: Table S3
	Supplementary table 3: standardized beta coefficients between blood levels of branched chain amino acids and food items, CoLaus|PsyColaus study, Lausanne, Switzerland, 2009-2012, overall and stratified by gender.
		ALL SUBJECTS							WOMEN							MEN
		Valine		Leucine		Isoleucine			Valine		Leucine		Isoleucine			Valine		Leucine		Isoleucine
	Food item	Beta	P-value	Beta	P-value	Beta	P-value		Beta	P-value	Beta	P-value	Beta	P-value		Beta	P-value	Beta	P-value	Beta	P-value
	Plain yogurth	-0.02	0.283	-0.015	0.391	-0.025	0.152		-0.051	0.071	-0.02	0.472	-0.043	0.126		0.001	0.964	-0.021	0.513	-0.022	0.484
	Low-fat yogurth	-0.028	0.143	-0.018	0.296	-0.02	0.253		-0.035	0.212	-0.021	0.46	-0.035	0.212		-0.028	0.391	-0.025	0.43	-0.013	0.677
	Fruit/aroma yogurth	-0.022	0.238	-0.017	0.307	-0.021	0.225		0.011	0.687	0.013	0.626	0.024	0.382		-0.06	0.06	-0.052	0.105	-0.068	0.033
	Cottage cheese (0% fat)	-0.004	0.83	-0.008	0.643	-0.021	0.227		0	0.989	0.011	0.696	0.001	0.983		-0.009	0.773	-0.033	0.306	-0.053	0.1
	Cottage cheese, ricotta	0.013	0.488	0.012	0.504	0.001	0.956		0.031	0.264	0.011	0.696	-0.001	0.978		0.002	0.94	0.016	0.621	0.003	0.934
	Feta, mozzarella	0.005	0.803	-0.001	0.969	-0.002	0.896		0.016	0.576	0.017	0.547	0.006	0.824		-0.001	0.977	-0.015	0.635	-0.012	0.7
	Gruyère, tomme, camembert	0.021	0.275	0.018	0.294	0.016	0.369		0.009	0.753	0.016	0.564	0.018	0.526		0.036	0.262	0.028	0.387	0.021	0.508
	Cheese fondue	0.053	0.005	0.048	0.005	0.038	0.028		0.044	0.116	0.026	0.346	0.025	0.359		0.075	0.02	0.083	0.01	0.062	0.057
	White or soft bread, tresse	0.003	0.875	-0.003	0.852	0.004	0.803		0.016	0.573	0.003	0.914	0.008	0.773		0	0.995	-0.008	0.805	0.002	0.947
	Whole wheat bread, rye bread	0.042	0.027	0.018	0.296	0.009	0.594		0.06	0.03	0.054	0.052	0.043	0.121		0.04	0.216	-0.001	0.97	-0.01	0.745
	Müesli	-0.011	0.573	0.001	0.97	-0.01	0.576		-0.003	0.912	0.014	0.627	-0.001	0.973		-0.03	0.35	-0.018	0.571	-0.028	0.379
	Corn-flakes, puffed rice	0.028	0.127	0.036	0.034	0.043	0.012		-0.012	0.678	-0.006	0.84	0	0.987		0.066	0.037	0.079	0.013	0.09	0.005
	Rusks, swedish bread	0.012	0.512	0.016	0.351	0.029	0.101		0.019	0.503	0.049	0.08	0.034	0.224		0.015	0.633	0.013	0.693	0.039	0.221
	Beef, horse, veal	-0.001	0.976	0.007	0.68	0.003	0.871		-0.016	0.566	-0.002	0.953	0.01	0.715		0.006	0.855	0.012	0.71	-0.002	0.956
	Chicken, skinned	-0.005	0.771	-0.009	0.583	-0.018	0.306		-0.031	0.271	-0.027	0.334	-0.054	0.051		0.007	0.827	-0.005	0.87	-0.005	0.871
	Chicken, with skin	0.001	0.939	-0.002	0.929	0.003	0.856		-0.041	0.142	-0.017	0.541	-0.032	0.245		0.027	0.404	0.002	0.949	0.021	0.52
	Hamburger, rib steak, roasted meat	0.044	0.019	0.024	0.165	0.007	0.674		0.024	0.395	-0.011	0.7	-0.004	0.897		0.073	0.023	0.067	0.036	0.019	0.55
	Cured ham, mutton or pork chops	-0.025	0.185	-0.014	0.403	-0.011	0.514		-0.049	0.083	-0.049	0.08	-0.037	0.191		-0.011	0.741	0.006	0.84	0.004	0.907
	Sausage, salami, ham	0.017	0.375	-0.001	0.943	0.006	0.727		0.034	0.227	0.018	0.514	0.038	0.169		0.002	0.944	-0.025	0.438	-0.027	0.404
	Pâté, terrine	0	0.998	-0.005	0.773	-0.013	0.447		-0.029	0.297	-0.029	0.296	-0.033	0.24		0.024	0.449	0.009	0.769	-0.005	0.889
	Cervelas, wieners	0.003	0.864	-0.003	0.841	-0.005	0.785		-0.006	0.824	-0.025	0.376	-0.026	0.348		0.011	0.722	0.013	0.683	0.011	0.723
	Frankfurter, small sausages	0.016	0.405	0.008	0.631	-0.006	0.735		0.032	0.266	0.019	0.516	-0.019	0.499		0.011	0.733	0.012	0.705	0.009	0.771
	Liver (veal or pork), offalls	-0.024	0.199	-0.005	0.77	-0.024	0.159		-0.03	0.28	0.001	0.975	-0.022	0.435		-0.021	0.514	-0.009	0.775	-0.037	0.245
	Liver (poultry)	0.004	0.847	-0.001	0.969	-0.027	0.11		0.005	0.869	0.005	0.863	-0.032	0.255		0.003	0.925	-0.011	0.732	-0.044	0.171
	Salmon (fresh or smoked)	0.013	0.502	0.016	0.354	0.012	0.488		-0.02	0.483	-0.01	0.722	-0.026	0.348		0.071	0.026	0.069	0.032	0.076	0.018
	Fried or breaded fish	-0.02	0.278	-0.02	0.241	-0.03	0.084		-0.022	0.424	-0.012	0.656	-0.031	0.263		-0.028	0.388	-0.046	0.152	-0.05	0.118
	Tuna in oil	-0.004	0.821	0.004	0.821	-0.014	0.413		-0.002	0.937	0.006	0.818	-0.013	0.647		-0.002	0.938	0.005	0.868	-0.023	0.48
	White fish (cod, trout, hake)	0.016	0.397	0.02	0.255	0.02	0.25		0.028	0.317	0.041	0.149	0.034	0.226		0.013	0.693	0.01	0.763	0.018	0.575
	Seafood (shrimps, mussels)	-0.045	0.017	-0.034	0.051	-0.044	0.011		-0.042	0.139	-0.021	0.454	-0.028	0.32		-0.058	0.07	-0.062	0.051	-0.083	0.01
	Green beans, spinach	0.003	0.861	-0.007	0.699	0.009	0.614		0.01	0.721	-0.003	0.91	0.02	0.468		-0.014	0.66	-0.023	0.469	-0.007	0.829
	Cauliflower, broccoli	-0.036	0.053	-0.028	0.106	-0.032	0.064		-0.034	0.227	-0.032	0.246	-0.038	0.172		-0.049	0.125	-0.035	0.27	-0.041	0.201
	Tomatoes	-0.039	0.037	-0.041	0.017	-0.052	0.002		-0.041	0.14	-0.057	0.04	-0.051	0.064		-0.047	0.138	-0.046	0.144	-0.076	0.017
	Carrots	-0.056	0.003	-0.045	0.009	-0.059	0.001		-0.099	<0.001	-0.083	0.003	-0.101	<0.001		-0.039	0.218	-0.041	0.199	-0.054	0.093
	Green salad	-0.025	0.189	-0.026	0.146	-0.03	0.096		-0.034	0.234	-0.035	0.214	-0.024	0.398		-0.024	0.464	-0.029	0.368	-0.045	0.169
	Vinaigrette sauce	-0.002	0.935	0.001	0.956	0.001	0.961		-0.012	0.674	0	0.995	0.012	0.665		0.003	0.914	-0.008	0.815	-0.019	0.558
	Green peas, corn, maize	0.008	0.679	0.015	0.418	0.015	0.426		0.004	0.89	0.013	0.657	0.035	0.218		0.015	0.647	0.021	0.511	0.01	0.764
	Avocado	-0.004	0.847	-0.016	0.379	-0.012	0.495		-0.018	0.524	-0.026	0.344	-0.025	0.366		-0.004	0.9	-0.019	0.553	-0.011	0.723
	Vegetable broth	0.004	0.832	0.009	0.591	0.013	0.444		0.017	0.538	0.008	0.784	0.029	0.308		0.001	0.982	0.021	0.517	0.011	0.742
	Vegetable soup (peas, beans, minestrone)	-0.023	0.234	-0.003	0.86	0.003	0.88		0.001	0.959	0.001	0.961	0.007	0.809		-0.04	0.205	-0.006	0.853	0.002	0.962
	Potatoes, boiled	-0.012	0.525	-0.013	0.443	-0.031	0.074		-0.01	0.709	-0.001	0.962	-0.018	0.523		-0.01	0.754	-0.021	0.517	-0.048	0.132
	French fries	-0.017	0.383	-0.02	0.261	-0.024	0.186		-0.023	0.419	-0.021	0.469	-0.018	0.523		-0.018	0.571	-0.029	0.367	-0.039	0.23
	Pasta	-0.042	0.026	-0.03	0.083	-0.032	0.064		-0.035	0.205	-0.038	0.178	-0.03	0.275		-0.055	0.087	-0.036	0.257	-0.045	0.165
	Ravioli, tortellini, cannelloni	0.025	0.181	0.004	0.824	0.004	0.805		0.047	0.095	0.011	0.69	0.014	0.607		0.004	0.896	-0.006	0.858	-0.009	0.776
	Rice	-0.013	0.478	-0.031	0.069	-0.044	0.011		0.002	0.939	-0.04	0.154	-0.057	0.04		-0.047	0.142	-0.046	0.147	-0.063	0.049
	Tomato sauce	-0.008	0.662	-0.013	0.452	-0.011	0.509		0.009	0.741	-0.002	0.944	-0.009	0.734		-0.029	0.358	-0.024	0.453	-0.009	0.779
	Couscous, semolina	-0.03	0.116	-0.017	0.321	-0.017	0.314		0.016	0.58	0.026	0.366	0.032	0.252		-0.069	0.03	-0.048	0.131	-0.054	0.09
	Pizza	-0.021	0.273	-0.022	0.196	-0.035	0.045		-0.026	0.353	-0.019	0.5	-0.012	0.674		-0.018	0.582	-0.024	0.459	-0.057	0.081
	Quiche	-0.029	0.122	-0.027	0.109	-0.011	0.539		-0.017	0.544	-0.034	0.222	-0.023	0.408		-0.042	0.19	-0.029	0.358	-0.003	0.934
	Eggs (any processing)	-0.053	0.005	-0.046	0.008	-0.023	0.192		-0.015	0.595	-0.039	0.165	-0.019	0.489		-0.091	0.004	-0.062	0.054	-0.025	0.442
	Tofu	-0.014	0.474	-0.014	0.406	-0.021	0.221		-0.027	0.342	-0.028	0.313	-0.051	0.067		-0.004	0.909	-0.011	0.739	-0.001	0.972
	Margarine, low fat	-0.01	0.607	-0.007	0.674	-0.001	0.938		0.002	0.947	0	0.996	0	0.992		-0.03	0.354	-0.024	0.461	-0.007	0.82
	Butter	-0.041	0.03	-0.018	0.293	-0.038	0.027		-0.065	0.019	-0.027	0.331	-0.064	0.022		-0.016	0.616	-0.012	0.716	-0.021	0.516
	Cream (35% fat)	-0.049	0.008	-0.032	0.06	-0.04	0.019		-0.107	0	-0.094	0.001	-0.099	0		0.016	0.622	0.029	0.367	0.011	0.74
	Mayonnaise sauce	-0.033	0.082	-0.037	0.036	-0.034	0.05		-0.041	0.148	-0.047	0.092	-0.041	0.144		-0.039	0.227	-0.056	0.083	-0.059	0.068
	Banana, apple, pear, plum, grapes	-0.014	0.451	-0.004	0.798	-0.02	0.234		-0.029	0.3	-0.026	0.355	-0.045	0.107		0.001	0.983	0.014	0.669	-0.009	0.776
	Citrus fruits (orange, mandarine)	-0.028	0.136	-0.027	0.108	-0.025	0.138		-0.039	0.161	-0.047	0.093	-0.046	0.099		-0.018	0.57	-0.016	0.611	-0.011	0.722
	Peach, apricot, melon	-0.045	0.018	-0.02	0.253	-0.026	0.142		-0.055	0.049	-0.02	0.473	-0.03	0.286		-0.048	0.135	-0.03	0.35	-0.032	0.322
	Berries (strawberries, blueberries)	-0.053	0.006	-0.038	0.03	-0.049	0.005		-0.056	0.048	-0.017	0.537	-0.049	0.082		-0.064	0.046	-0.063	0.05	-0.065	0.044
	Kiwi	-0.003	0.875	-0.001	0.963	-0.006	0.713		-0.031	0.264	-0.016	0.556	-0.006	0.824		0.012	0.712	0.006	0.841	-0.008	0.798
	Fruit, preserve	-0.03	0.106	-0.013	0.438	-0.023	0.172		-0.043	0.13	-0.013	0.647	-0.018	0.519		-0.017	0.603	-0.01	0.758	-0.028	0.385
	Croissant, chocolate bread	-0.045	0.016	-0.041	0.016	-0.042	0.014		-0.045	0.103	-0.033	0.236	-0.045	0.101		-0.053	0.093	-0.058	0.067	-0.051	0.11
	Fruit tart	-0.046	0.016	-0.055	0.001	-0.05	0.004		-0.028	0.33	-0.04	0.155	-0.026	0.358		-0.068	0.037	-0.079	0.015	-0.078	0.017
	Cream tart, cream cake	-0.025	0.185	-0.007	0.681	-0.019	0.29		-0.035	0.218	-0.018	0.517	-0.018	0.526		-0.023	0.491	0.006	0.86	-0.022	0.515
	Cake, dried pastries	-0.013	0.499	-0.003	0.871	0.009	0.602		0.01	0.727	0.029	0.29	0.023	0.403		-0.029	0.364	-0.02	0.535	0.009	0.779
	Biscuits, cookies	0.013	0.491	0.011	0.511	0.008	0.646		0.029	0.302	0.031	0.268	0.039	0.161		0.001	0.981	-0.003	0.937	-0.015	0.645
	Chocolate	-0.017	0.383	-0.016	0.37	-0.009	0.601		0.007	0.814	0.02	0.48	0.021	0.454		-0.035	0.291	-0.043	0.191	-0.029	0.379
	Honey, jam	0.028	0.137	0.049	0.004	0.041	0.016		0.029	0.301	0.039	0.164	0.024	0.383		0.037	0.248	0.08	0.012	0.072	0.024
	Ice cream, sorbet	0	0.994	0.015	0.368	0.021	0.22		0.014	0.606	0.025	0.368	0.038	0.173		-0.01	0.758	0.019	0.545	0.02	0.524
	Sugar	0.008	0.669	0.003	0.876	-0.007	0.673		0.035	0.208	0.039	0.166	0.016	0.561		-0.018	0.562	-0.029	0.363	-0.03	0.346
	Butter (for cooking)	-0.024	0.199	-0.009	0.605	-0.004	0.813		-0.027	0.333	-0.028	0.312	-0.015	0.59		-0.031	0.333	-0.004	0.905	-0.003	0.925
	Margarine (for cooking)	-0.018	0.329	-0.005	0.794	0.006	0.728		0.006	0.841	0.012	0.663	0.032	0.244		-0.036	0.267	-0.014	0.671	-0.006	0.846
	Olive oil (for cooking)	0.003	0.892	-0.015	0.383	-0.032	0.064		0.01	0.733	-0.02	0.48	-0.026	0.351		-0.008	0.795	-0.023	0.476	-0.051	0.113
	Peanut oil (for cooking)	0.015	0.423	0.001	0.938	-0.018	0.293		0.013	0.637	0.007	0.811	-0.027	0.333		0.018	0.57	-0.004	0.899	-0.018	0.581
	Sunflowerseed oil (for cooking)	0.024	0.195	0.01	0.559	-0.002	0.889		0.064	0.023	0.04	0.155	0.034	0.225		-0.014	0.662	-0.01	0.744	-0.038	0.241
	Coffee (excl. Decafeinated)	-0.025	0.179	-0.015	0.394	-0.014	0.431		-0.01	0.726	0.002	0.931	0.012	0.676		-0.058	0.066	-0.046	0.149	-0.054	0.092
	Milk in coffee (0% fat)	-0.042	0.023	-0.036	0.037	-0.039	0.024		-0.037	0.19	-0.039	0.157	-0.047	0.092		-0.057	0.073	-0.044	0.17	-0.044	0.17
	Milk in coffee (non 0% fat)	-0.001	0.964	-0.017	0.329	-0.023	0.181		-0.005	0.86	-0.013	0.63	-0.029	0.294		-0.003	0.93	-0.031	0.333	-0.032	0.323
	Coffee creamer	-0.007	0.694	0.001	0.975	-0.007	0.696		0.041	0.14	0.043	0.119	0.021	0.454		-0.062	0.051	-0.042	0.186	-0.038	0.227
	Milk as drink (0% fat)	0.036	0.053	0.029	0.089	0.029	0.087		0.028	0.323	0.03	0.278	0.038	0.166		0.052	0.105	0.036	0.261	0.03	0.357
	Milk as drink (non 0% fat)	0.031	0.1	0.028	0.099	0.025	0.143		-0.007	0.792	0	0.994	0.003	0.921		0.097	0.002	0.084	0.008	0.072	0.023
	Mineral water (Aproz, Valser, San Pellegrino)	-0.024	0.206	-0.026	0.127	-0.029	0.096		-0.01	0.733	-0.024	0.385	-0.024	0.391		-0.038	0.237	-0.029	0.374	-0.035	0.273
	Mineral water (Perrier, Vittel, Volvic)	-0.038	0.041	-0.03	0.082	-0.021	0.226		-0.029	0.299	-0.021	0.446	-0.007	0.807		-0.054	0.092	-0.044	0.168	-0.036	0.257
	Tap water, mineral water (Henniez, Evian, Vichy)	-0.051	0.007	-0.038	0.031	-0.032	0.064		-0.023	0.417	-0.018	0.517	-0.001	0.985		-0.089	0.005	-0.071	0.028	-0.073	0.025
	Lemonade, soda, syrup	-0.01	0.591	-0.009	0.584	-0.006	0.714		0.006	0.839	-0.001	0.982	0.008	0.766		-0.034	0.285	-0.027	0.392	-0.026	0.408
	Fresh fruit juice	0.011	0.572	0.009	0.599	0	0.979		0.022	0.427	0.027	0.338	0.004	0.884		-0.007	0.831	-0.01	0.766	-0.008	0.797
	Bottled fruit juice	-0.01	0.612	-0.016	0.363	-0.024	0.183		-0.007	0.792	-0.012	0.665	0.002	0.939		-0.017	0.593	-0.032	0.313	-0.07	0.03
	Tea, herbal tea	-0.015	0.448	-0.005	0.794	0.003	0.871		-0.014	0.626	0.006	0.822	0.004	0.876		-0.01	0.749	-0.005	0.87	0.01	0.753
	Beer	0.003	0.858	0.044	0.012	0.031	0.083		-0.008	0.769	0.053	0.058	0.038	0.18		0.02	0.549	0.057	0.082	0.037	0.264
	Wine, champagne	-0.01	0.606	0.001	0.955	0.01	0.574		0.02	0.465	0.024	0.394	0.04	0.152		-0.038	0.241	-0.013	0.676	-0.006	0.864
	Aperitifs (Martini)	-0.027	0.157	-0.013	0.441	0.005	0.776		-0.004	0.887	0.002	0.93	0.018	0.527		-0.053	0.101	-0.033	0.297	-0.007	0.834
	Spirits (whisky, licquor)	-0.016	0.412	-0.022	0.204	-0.025	0.15		0.01	0.728	-0.011	0.7	0.011	0.692		-0.034	0.299	-0.032	0.332	-0.06	0.069
	Analysis conducted using linear regression adjusting for gender (ALL only), age (continuous), smoking (never, former, current), educational level (high, medium, low), marital status (in couple, alone), born in Switzerland (yes, no), on a diet (yes, no), BMI categories (normal, overweight, obese), and sedentary status (yes, no)

## Sheet: Table S4
	Supplementary table 4: Spearman correlation coefficients between blood levels of branched chain amino acids and main food groups, CoLaus|PsyColaus study, Lausanne, Switzerland, 2009-2012, overall and stratified by gender.
		Leucine		Isoleucine		Valine
	Nutrients, gr or mL/day	Spearman r	P-value	Spearman r	P-value	Spearman r	P-value
	ALL
	Total dairy	-0.0150115	0.485712	-0.0448344	0.0372445	-0.0129637	0.54715
	Total meat	0.221904	1.71e-25	0.190646	4.06e-19	0.199477	8.16e-21
	Total processed meat	0.199287	8.9e-21	0.18838	1.07e-18	0.169651	2.09e-15
	Total fish	0.0226816	0.292146	0.0122763	0.568604	0.0301121	0.161913
	Total vegetables	-0.0689404	0.0013493	-0.102897	1.66e-06	-0.0628896	0.0034626
	Total fruits	-0.139769	6.91e-11	-0.156991	2.2e-13	-0.115624	7.15e-08
	WOMEN
	Total dairy	-0.0408286	0.147979	-0.0807633	0.0041671	-0.0256577	0.363393
	Total meat	0.0226427	0.422505	-0.0060365	0.830696	0.033928	0.229348
	Total processed meat	0.0457774	0.104753	0.0284029	0.314318	0.0372424	0.186987
	Total fish	-0.0260918	0.35533	-0.027263	0.334142	-0.0052139	0.853488
	Total vegetables	-0.004435	0.875179	-0.0498679	0.0771668	-0.0034222	0.903523
	Total fruits	-0.0596021	0.0346075	-0.091896	0.0011072	-0.0595149	0.0348734
	MEN
	Total dairy	-0.0279713	0.401429	-0.0568704	0.0878182	-0.0200206	0.548166
	Total meat	0.149401	6.6e-06	0.0964574	0.0037354	0.145809	1.1e-05
	Total processed meat	0.0958724	0.0039514	0.0908217	0.0063423	0.0942574	0.0046078
	Total fish	0.0441013	0.18573	0.0139319	0.676049	0.0492855	0.139126
	Total vegetables	-0.015094	0.650751	-0.0535902	0.107744	-0.030371	0.362249
	Total fruits	-0.0124002	0.709955	-0.0066758	0.841307	-0.0046823	0.88832
	Results are expressed as Spearman correlation coefficient and corresponding p-value.

## Sheet: Table S5
	Supplementary table 5: Spearman correlation coefficients between blood levels of branched chain amino acids and nutrients, CoLaus|PsyColaus study, Lausanne, Switzerland, 2009-2012, overall and stratified by gender.
		Leucine		Isoleucine		Valine
	Nutrients	Spearman r	P-value	Spearman r	P-value	Spearman r	P-value
	ALL
	Total protein, gr/day	0.204682	7.48e-22	0.171115	1.19e-15	0.173341	5.02e-16
	Vegetal protein, gr/day	0.108826	4e-07	0.0883789	3.92e-05	0.069431	0.001246
	Animal protein, gr/day	0.209962	6.18e-23	0.175223	2.39e-16	0.184086	6.56e-18
	Total carbohydrates, gr/day	0.10596	8.04e-07	0.0888368	3.57e-05	0.0552109	0.0102923
	Monossaccharides, gr/day	-0.0067488	0.753972	-0.0258578	0.229756	-0.0359329	0.0950787
	Polyssaccharides, gr/day	0.187702	1.43e-18	0.177941	8.1e-17	0.134995	3.02e-10
	Total fat, gr/day	0.16683	6.09e-15	0.148707	3.8e-12	0.131757	7.98e-10
	Saturated fat (SFA), gr/day	0.175578	2.08e-16	0.155042	4.37e-13	0.134324	3.7e-10
	Monounsaturated fat (MUFA), gr/day	0.144106	1.73e-11	0.127439	2.81e-09	0.11742	4.46e-08
	Polyunsaturated fat (PUFA), gr/day	0.164588	1.41e-14	0.165197	1.12e-14	0.125425	4.99e-09
	Total fibre, gr/day	-0.0924228	1.7e-05	-0.12056	1.92e-08	-0.0820414	0.0001355
	Cholesterol, mg/day	0.112664	1.53e-07	0.0897244	2.98e-05	0.0999612	3.26e-06
	Alcohol, mL/day	0.23645	8.14e-29	0.219273	6.46e-25	0.167319	5.07e-15
	Calcium, mg/day	-0.0086068	0.689383	-0.0395386	0.066237	-0.0009388	0.965225
	Iron, mg/day	0.083023	0.0001124	0.0464153	0.0310366	0.0588573	0.0062268
	WOMEN
	Total protein, gr/day	-0.0159193	0.572836	-0.0482196	0.0874733	0.0016473	0.953473
	Vegetal protein, gr/day	-0.0295658	0.294906	-0.0544794	0.0534788	-0.0416558	0.139932
	Animal protein, gr/day	-0.0081223	0.773586	-0.0390437	0.166539	0.0138532	0.623646
	Total carbohydrates, gr/day	-0.0486331	0.0847888	-0.0729174	0.0097069	-0.0712667	0.0114909
	Monossaccharides, gr/day	-0.0509213	0.0711142	-0.0886184	0.0016611	-0.0702792	0.0126921
	Polyssaccharides, gr/day	-0.0156	0.580558	-0.0185341	0.511494	-0.026824	0.341987
	Total fat, gr/day	0.0087436	0.756793	-0.0113546	0.687551	0.012089	0.66851
	Saturated fat (SFA), gr/day	-0.0186169	0.509608	-0.039563	0.160966	-0.0172829	0.540414
	Monounsaturated fat (MUFA), gr/day	0.0265333	0.347246	0.0066133	0.8148	0.0298357	0.290519
	Polyunsaturated fat (PUFA), gr/day	0.0205447	0.466767	0.0280864	0.319743	0.0247191	0.381215
	Total fibre, gr/day	-0.0444604	0.115136	-0.0831167	0.003188	-0.0566631	0.0445838
	Cholesterol, mg/day	0.0098001	0.728502	-0.0124675	0.658776	0.0185055	0.512145
	Alcohol, mL/day	0.06166	0.0288149	0.0442111	0.11719	0.0041546	0.883013
	Calcium, mg/day	-0.0439519	0.119356	-0.0777091	0.0058416	-0.0284038	0.314302
	Iron, mg/day	-0.00192	0.945781	-0.0493031	0.0805808	-0.0132277	0.639405
	MEN
	Total protein, gr/day	0.0438605	0.188146	-0.0124369	0.709135	0.054459	0.102148
	Vegetal protein, gr/day	-0.0638177	0.0553711	-0.100601	0.0024873	-0.0615633	0.0645823
	Animal protein, gr/day	0.0872356	0.0087585	0.031176	0.34966	0.0932237	0.0050781
	Total carbohydrates, gr/day	-0.0824262	0.0132747	-0.101912	0.0021805	-0.0865245	0.0093253
	Monossaccharides, gr/day	-0.0820468	0.013706	-0.0737738	0.0267177	-0.0904472	0.0065631
	Polyssaccharides, gr/day	-0.0525991	0.114421	-0.0897454	0.0069955	-0.0517241	0.120583
	Total fat, gr/day	-0.0006847	0.983617	-0.0229877	0.49049	-0.0064336	0.846993
	Saturated fat (SFA), gr/day	-0.0071444	0.830331	-0.0406615	0.222461	-0.0115916	0.728093
	Monounsaturated fat (MUFA), gr/day	0.0098367	0.767975	-0.00472	0.887426	0.0061326	0.854069
	Polyunsaturated fat (PUFA), gr/day	-0.0113078	0.734496	-0.0139185	0.676343	-0.0313191	0.347452
	Total fibre, gr/day	-0.0356515	0.284805	-0.0704728	0.0343255	-0.0185075	0.578813
	Cholesterol, mg/day	0.0556196	0.095035	0.0152284	0.64785	0.0576283	0.083665
	Alcohol, mL/day	0.0482615	0.147537	0.0227179	0.495596	0.022019	0.508955
	Calcium, mg/day	-0.001662	0.960245	-0.0433399	0.193448	0.0210274	0.528226
	Iron, mg/day	0.0282496	0.396761	-0.0204416	0.539783	0.0230319	0.489655
	Results are expressed as Spearman correlation coefficient and corresponding p-value.

## Sheet: Table S6
	Supplementary table 6: Spearman correlation coefficients between blood levels of branched chain amino acids and dietary scores, CoLaus|PsyColaus study, Lausanne, Switzerland, 2009-2012, overall and stratified by gender.
		Leucine		Isoleucine		Valine
	Nutrients, gr or mL/day	Spearman r	P-value	Spearman r	P-value	Spearman r	P-value
	ALL
	Mediterranean diet score (Trichopoulou)	0.0093303	0.664802	-0.0012806	0.95258	-0.0032517	0.879973
	Mediterranean diet score (Vormund)	-0.0070368	0.743834	-0.0345426	0.108588	-0.0089339	0.678228
	Alternate healthy eating index (Version 1)	-0.0974991	5.67e-06	-0.117328	4.57e-08	-0.0850807	7.55e-05
	Alternate healthy eating index (Version 2)	-0.0992599	3.82e-06	-0.119419	2.61e-08	-0.0864223	5.8e-05
	WOMEN
	Mediterranean diet score (Trichopoulou)	-0.0065067	0.817731	-0.0251468	0.37303	-0.0144408	0.608998
	Mediterranean diet score (Vormund)	-0.0028193	0.920457	-0.0421467	0.135318	-0.0068935	0.807105
	Alternate healthy eating index (Version 1)	-0.0234521	0.406108	-0.056395	0.045604	-0.0369348	0.190657
	Alternate healthy eating index (Version 2)	-0.0249411	0.376954	-0.0587282	0.0373529	-0.0377024	0.181597
	MEN
	Mediterranean diet score (Trichopoulou)	-0.0335504	0.314167	-0.0369235	0.267959	-0.0341369	0.305779
	Mediterranean diet score (Vormund)	0.0177009	0.595473	-0.0095425	0.774723	0.0136446	0.68236
	Alternate healthy eating index (Version 1)	-0.0403571	0.225945	-0.0575022	0.0843448	-0.0217034	0.515048
	Alternate healthy eating index (Version 2)	-0.0407098	0.221912	-0.0581786	0.0807498	-0.0216983	0.515146
	Results are expressed as Spearman correlation coefficient and corresponding p-value.

## Sheet: Table S7
	Supplementary table 7: blood levels of branched chain amino acids according to compliance to dietary guidelines, CoLaus|PsyColaus study, Lausanne, Switzerland, 2009-2012, overall and stratified by gender.
		Leucine			Isoleucine			Valine
	Gender / guideline	Non complier	Complier	P-value	Non complier	Complier	P-value	Non complier	Complier	P-value
	ALL
	Fruits ≥ 2/day	121 ± 26	115 ± 23	<0.001	56 ± 14	53 ± 12	<0.001	229 ± 46	221 ± 43	<0.001
	Vegetables ≥3/day	119 ± 25	113 ± 21	0.002	55 ± 13	51 ± 11	<0.001	226 ± 45	216 ± 41	0.004
	Meat ≤ 5/week	124 ± 26	116 ± 24	<0.001	57 ± 14	53 ± 13	<0.001	233 ± 47	221 ± 43	<0.001
	Fish all ≥ 1/week	119 ± 24	119 ± 26	0.84	55 ± 13	55 ± 14	0.456	225 ± 43	226 ± 46	0.4
	Fish not fried ≥ 1/week	120 ± 25	117 ± 25	0.027	55 ± 14	54 ± 13	<0.001	227 ± 45	224 ± 45	0.257
	Dairy ≥ 3/day	119 ± 25	115 ± 22	0.041	55 ± 13	52 ± 12	<0.001	226 ± 45	220 ± 43	0.05
	At least 3 guidelines a	120 ± 26	113 ± 22	<0.001	56 ± 14	51 ± 12	<0.001	228 ± 46	217 ± 41	<0.001
	At least 3 guidelines b	120 ± 26	112 ± 22	<0.001	56 ± 14	51 ± 11	<0.001	228 ± 46	215 ± 39	<0.001
	WOMEN
	Fruits ≥ 2/day	107 ± 17	106 ± 17	0.236	49 ± 9	48 ± 9	0.022	209 ± 37	207 ± 35	0.196
	Vegetables ≥3/day	106 ± 17	107 ± 17	0.585	48 ± 9	48 ± 9	0.66	208 ± 36	207 ± 36	0.756
	Meat ≤ 5/week	107 ± 19	106 ± 17	0.167	48 ± 10	48 ± 9	0.426	209 ± 38	207 ± 35	0.286
	Fish all ≥ 1/week	106 ± 17	106 ± 18	0.791	49 ± 9	48 ± 9	0.206	208 ± 35	208 ± 37	0.992
	Fish not fried ≥ 1/week	106 ± 17	106 ± 17	0.892	48 ± 9	48 ± 9	0.26	208 ± 37	208 ± 36	0.958
	Dairy ≥ 3/day	106 ± 17	106 ± 18	0.964	48 ± 9	47 ± 10	0.066	208 ± 36	209 ± 37	0.736
	At least 3 guidelines a	106 ± 17	106 ± 17	0.387	48 ± 9	47 ± 9	0.024	208 ± 37	206 ± 35	0.322
	At least 3 guidelines b	106 ± 17	106 ± 17	0.5	48 ± 9	47 ± 8	0.034	208 ± 37	207 ± 34	0.45
	MEN
	Fruits ≥ 2/day	136 ± 25	135 ± 21	0.491	64 ± 13	63 ± 12	0.617	250 ± 46	249 ± 43	0.632
	Vegetables ≥3/day	136 ± 24	131 ± 21	0.25	64 ± 13	61 ± 10	0.142	250 ± 45	245 ± 41	0.477
	Meat ≤ 5/week	138 ± 24	133 ± 24	0.002	64 ± 13	63 ± 13	0.082	254 ± 45	246 ± 45	0.006
	Fish all ≥ 1/week	136 ± 23	136 ± 25	0.908	64 ± 12	64 ± 13	0.568	248 ± 42	251 ± 46	0.325
	Fish not fried ≥ 1/week	136 ± 24	136 ± 24	0.721	64 ± 13	63 ± 13	0.441	249 ± 45	252 ± 45	0.272
	Dairy ≥ 3/day	136 ± 24	129 ± 21	0.012	64 ± 13	60 ± 11	0.002	251 ± 45	236 ± 46	0.005
	At least 3 guidelines a	137 ± 24	131 ± 22	0.006	64 ± 13	61 ± 12	0.008	252 ± 45	241 ± 43	0.007
	At least 3 guidelines b	136 ± 24	130 ± 23	0.011	64 ± 13	61 ± 13	0.008	251 ± 45	240 ± 42	0.009
	Results are expressed as average ± standard deviation. Between-group comparisons performed using student's t-test.
